# Supplementary material
Source: ML conference proceedings conference paper supplement (https://openreview.net/forum?id=J5VMAFJmho)
Supplement: supplementary_material [file DAMA_supplementary.pdf › DAMA_supplementary.pdf]

# DAMA: Disentangled Body-Anchored Gaussians for Controllable Multi-Layered Avatars

## Supplementary Material

### A. Implementation Details

#### A.1. Losses

**Color Loss.** We use an  $L_1$  loss between the rendered image and the ground-truth image:

$$\mathcal{L}_c = \|I_{\text{rend}} - I_{\text{gt}}\|_1. \quad (1)$$

For segmentation lifting,  $I_{\text{rend}}$  contains the rendered label colors assigned to semantic classes. For appearance optimization, it contains the rendered RGB colors.

**Scale Loss.** We keep the scales of segmentation Gaussians close to the scales of the corresponding SMPL-X Gaussians to preserve similar surface coverage. Let  $s_i^{\text{seg}}$  denote the scale of Gaussian  $g_i^{\text{seg}}$  and  $s_i^{\text{smplx}}$  the scale of its corresponding SMPL-X Gaussian. We use an  $L_1$  loss:

$$\mathcal{L}_s = \frac{1}{N_{\text{seg}}} \sum_{i=1}^{N_{\text{seg}}} \|s_i^{\text{seg}} - s_i^{\text{smplx}}\|_1. \quad (2)$$

**Normal Loss.**  $\mathcal{L}_n$  aligns Gaussian normals with normals estimated from rendered depth maps. We use the same formulation and implementation as the normal regularization introduced in 2DGS [2].

**Label Smoothness Loss.** Let  $\mathbf{p}_i$  denote the label probability vector of Gaussian  $g_i^{\text{seg}}$ , with label  $\ell_i^{\text{seg}} = \arg \max(\mathbf{p}_i)$ . We encourage neighboring Gaussians to share similar label distributions. For precomputed neighbors  $\mathcal{N}(i)$  we compute the KL divergence and average over all  $N_{\text{seg}}$  Gaussians:

$$\mathcal{L}_\ell = \frac{1}{N_{\text{seg}}} \sum_{i=1}^{N_{\text{seg}}} \frac{1}{|\mathcal{N}(i)|} \sum_{j \in \mathcal{N}(i)} D_{\text{KL}}(\mathbf{p}_i^{\text{seg}} \parallel \mathbf{p}_j^{\text{seg}}). \quad (3)$$

**Mask Loss.** We use an  $L_1$  loss between the rendered layer mask and the ground-truth layer mask:

$$\mathcal{L}_m = \|M_{\text{rend}} - M_{\text{gt}}\|_1. \quad (4)$$

**Anisotropic Loss.** We use the anisotropic regularizer  $\mathcal{L}_a$  introduced in PhysGaussian [4].

**Canonical Distance Loss.** We use an  $L_2$  loss to keep Gaussians close to the SMPL-X surface in canonical space. Let  $\mu_i^l$  be the Gaussian mean belonging to layer  $l$  and  $\mu_i^{\text{smplx}}$  the center of its bound SMPL-X face:

$$\mathcal{L}_d = \frac{1}{N_l} \sum_{i=1}^{N_l} \|\mu_i^l - \mu_i^{\text{smplx}}\|_2. \quad (5)$$

**Canonical Rotation Loss.** We align Gaussian orientations with the orientation of their bound SMPL-X face in canonical space. Let  $\mathbf{q}_i^l$  denote the Gaussian rotation belonging to

layer  $l$  and  $\mathbf{q}_i^{\text{smplx}}$  the SMPL-X face rotation, both in canonical space:

$$\mathcal{L}_r = \frac{1}{N_l} \sum_{i=1}^{N_l} \left(1 - \langle \mathbf{q}_i^l, \mathbf{q}_i^{\text{smplx}} \rangle\right). \quad (6)$$

#### A.2. Optimization and Runtime

We set the loss weights as follows:  $\lambda_c=1$ ,  $\lambda_s=10$ ,  $\lambda_n=0.1$ ,  $\lambda_\ell=0.1$ ,  $\lambda_a=100$ ,  $\lambda_d=1$ , and  $\lambda_r=100$ . All experiments run on a single NVIDIA A100 GPU. In Stage 1, we optimize  $\mathcal{G}^{\text{seg}}$  for 10k iterations ( $\sim 3$  min) and enable the label smoothness loss  $\mathcal{L}_\ell$  after 5k iterations. In Stage 3, we optimize each semantic layer independently for 2k iterations ( $\sim 1.5$  min per layer), followed by a final joint optimization of all layers for 2k iterations. The full method takes about 10–15 minutes depending on the number of layers.

### B. Additional Loss Ablations

We ablate  $\mathcal{L}_a$ ,  $\mathcal{L}_d$ , and  $\mathcal{L}_r$ .  $\mathcal{L}_a$  prevents Gaussian shrinkage/explosion, while  $\mathcal{L}_d$  and  $\mathcal{L}_r$  stabilize weakly supervised regions (e.g., underarms), preventing noisy geometry during animation (Fig.1).

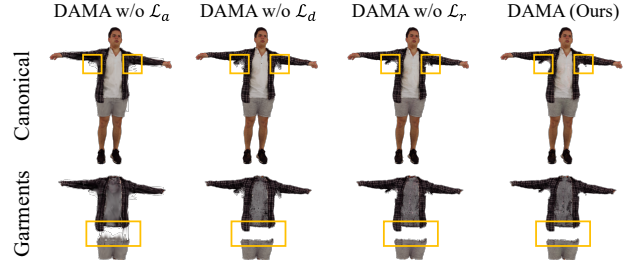

Figure 1. Additional Loss Ablations. Removing  $\mathcal{L}_a$ ,  $\mathcal{L}_d$ ,  $\mathcal{L}_r$ .

### C. Additional Applications and Results

**Hair Transfer.** Our representation extends to hair. Fig. 2 shows transferring hair from a source subject to a target and changing its layer order.

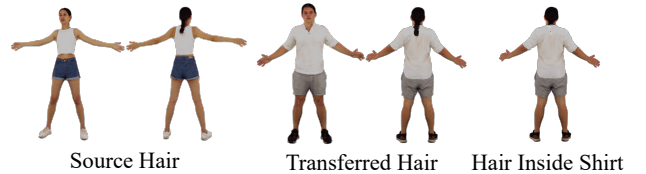

Figure 2. Hair Transfer. Source hair transferred and reordered.

**Additional Results.** We show SMPL-X-driven animation of stacked Gaussian garments with preserved layer ordering (Fig. 3). We also show further simulation results of stacked garment meshes extracted from the Gaussians (Fig. 4).

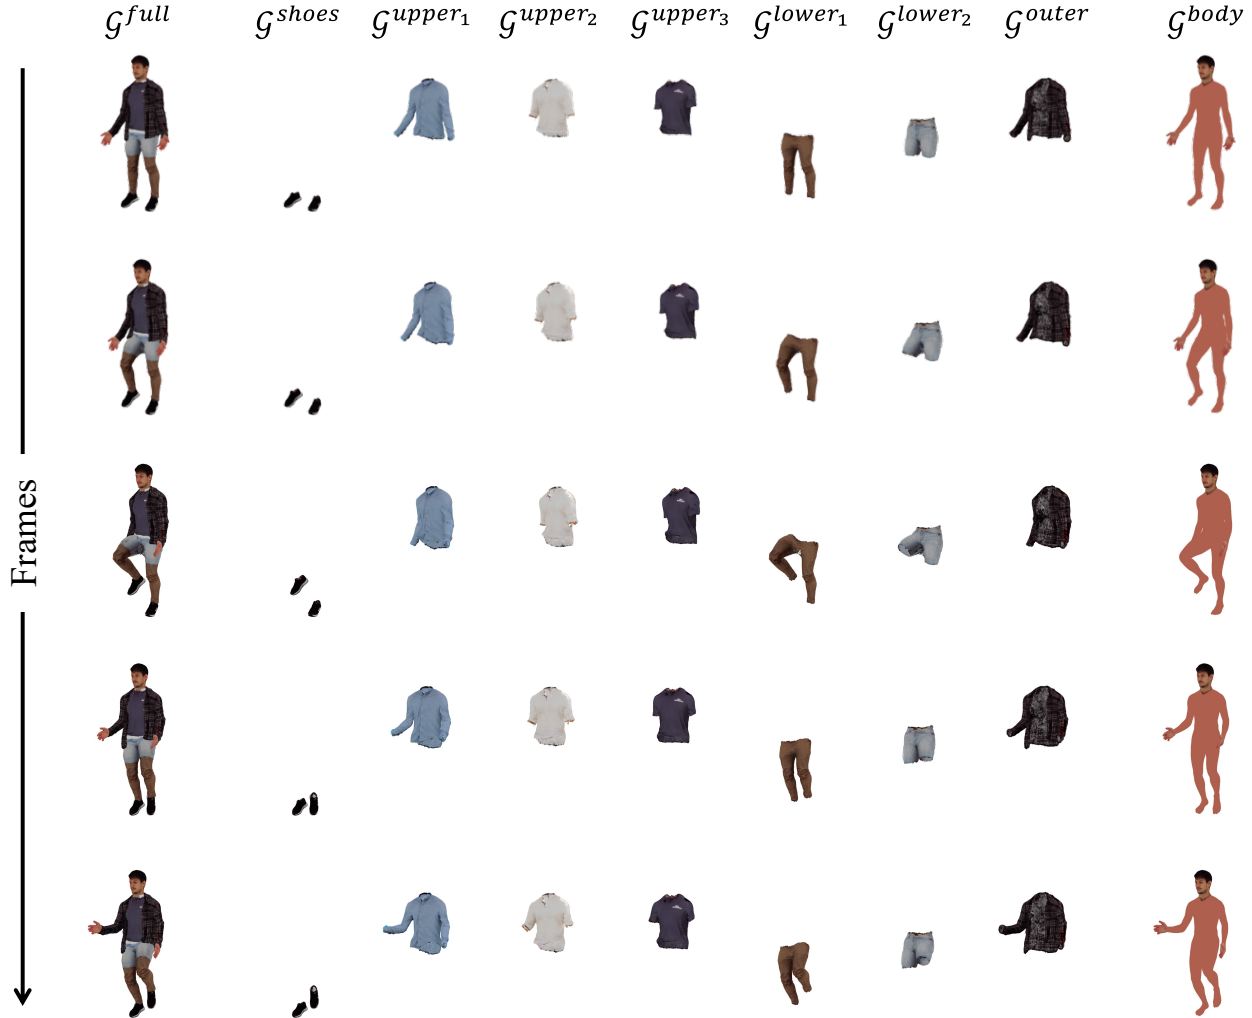

Figure 3. **SMPL-X-Driven Avatar Animation.** We animate the reconstructed avatar with transferred and stacked garments using SMPL-X motion sequences from AMASS [3]. The sequence shows that the layered garments deform consistently with the body while preserving their ordering and separation throughout the motion.

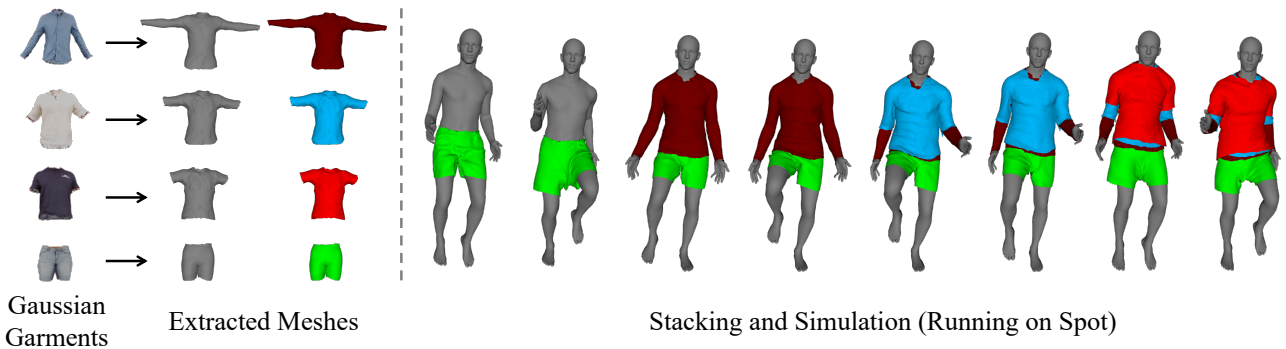

Figure 4. **Additional Clothing Simulation Example.** We show an additional example with one lower garment and three upper garments. (Left) Simulation-ready meshes extracted from the Gaussian layers. (Right) CLO3D [1] simulation driven by a running-on-spot motion sequence from AMASS [3]. The garments are progressively stacked, showing that the extracted meshes preserve layer ordering and remain stable during simulation.

064

**References**

065

066

067

068

069

070

071

072

073

074

075

076

077

078

079

- [1] CLO Virtual Fashion. Clo 2024.0, 2024. 3D Fashion Design Software. [2](#)
- [2] Binbin Huang, Zehao Yu, Anpei Chen, Andreas Geiger, and Shenghua Gao. 2d gaussian splatting for geometrically accurate radiance fields. In *SIGGRAPH 2024 Conference Papers*. Association for Computing Machinery, 2024. [1](#)
- [3] Naureen Mahmood, Nima Ghorbani, Nikolaus F. Troje, Gerard Pons-Moll, and Michael J. Black. AMASS: Archive of motion capture as surface shapes. In *International Conference on Computer Vision*, pages 5442–5451, 2019. [2](#)
- [4] Tianyi Xie, Zeshun Zong, Yuxing Qiu, Xuan Li, Yutao Feng, Yin Yang, and Chenfanfu Jiang. Physgaussian: Physics-integrated 3d gaussians for generative dynamics. In *Proceedings of the IEEE/CVF Conference on Computer Vision and Pattern Recognition*, pages 4389–4398, 2024. [1](#)
